# Supplementary material for: Removal of false positives in metagenomics-based taxonomy profiling via targeting Type IIB restriction sites
Source: PubMed Central journal article supplement (PMC10474111; doi:10.1038/s41467-023-41099-8), 2023-09-01
Supplement: 41467_2023_41099_MOESM1_ESM.pdf [file 41467_2023_41099_MOESM1_ESM.pdf]

# 1 Removal of false positives in metagenomic-based 2 taxonomy profiling via targeting Type IIB restriction sites

3 *Supplementary Information*

## 4 **Supplemental Methods**

### 5 **Supplemental Figures**

6 **Figure S1.** Distribution of theoretically existent and unique 2b tags for all the 48,475 species  
7 in the combined database of GTDB and Ensemble Fungi.

8 **Figure S2.** Sample-specific unique 2b database can largely expand the number of unique 2b  
9 tags compared to pre-constructed unique 2b database.

10 **Figure S3.** Comparing MAP2B with other profilers using simulation data generated by shared  
11 genome sources of different profilers.

12 **Figure S4.** Benchmarking MAP2B using simulation data generated by genome sources  
13 independent of GTDB or with a high mutation rate.

14 **Figure S5.** Assessing MAP2B's microbial profiles in disease discrimination (validation cohort)  
15 and prediction of metabolomic profiles (using mNODE).

16 **Figure S6.** Comparison of the algorithm implemented in MAP2B and conventional  
17 metagenomic profiling tools.

18 **Figure S7.** Definition of the terminology used in the species identification procedures of  
19 MAP2B.

20 **Figure S8.** Top-10 feature combinations in each machine learning classifier when selecting  
21 the false positive recognition model.

22 **Figure S9.** Performance evaluations of the machine learning model on false positive  
23 recognition based on 50 times five-fold cross-validation.

### 24 **Reference**

25

## 26 Supplemental Methods

### 27 Feature engineering and selection for the false positive recognition model

28 We sought to resolve the false-positive identification issue by leveraging a classifier that relies  
29 on meaningful biological features (**Fig. S7**). Consider the *in silico* digestion of reference  
30 genomes and a given WMS dataset. For species-*i* in the integrated database of GTDB<sup>1</sup> and  
31 Ensembl Fungi<sup>2</sup>, we denote its total number of 2b tags generated by *in silico* digestion of its  
32 genome as  $H_i$ , representing the number of its theoretically existent 2b tags. Among the  $H_i$   
33 tags, there are  $E_i$  unique 2b tags, which are single-copy within species-*i*'s genome and are  
34 unique to species-*i* w.r.t all other species in the database.

35

36 Given an input WMS dataset with total  $R$  reads, we *in silico* extract 2b tags, map them to the  
37 species-specific 2b tags, and denote the number of tags unique to species-*i* as  $Q_i$   
38 (sequenced unique 2b tags). Among the  $Q_i$  tags unique to species-*i*, there are  $U_i$   
39 nonredundant (or distinct) sequenced unique 2b tags.

40

41 The genome coverage of species-*i* can be calculated as  $C_i = U_i/E_i$ . Usually, we have  $C_i < 1$   
42 for WMS data of complex microbial communities. But we can infer the actual number of  
43 sequenced unique 2b tags of species-*i*, denoted as  $\tilde{Q}_i$ , by its genome coverage correction,  
44 i.e.,  $\tilde{Q}_i = Q_i/C_i = (Q_i E_i)/U_i$ .

45

46 Now we propose seven features to help us distinguish false positives from true positives.  
47 Those seven features can be classified into three distinct categories:

48 (1) Related to the genome coverage:

$$49 \text{ Feature 1} = C_i = \frac{U_i}{E_i}, (\text{genome coverage}) \quad (7)$$

50 (2) Related to the taxonomic and sequence abundance:

$$51 \text{ Feature 2} = N_i = \frac{Q_i}{U_i}, (\text{taxonomic counts}) \quad (8)$$

$$52 \text{ Feature 3} = \frac{Q_i}{H_i}, \quad (9)$$

$$53 \text{ Feature 4} = \frac{Q_i}{R}, \quad (10)$$

$$54 \text{ Feature 5} = R_i = \frac{\tilde{Q}_i}{R}, (\text{sequence counts}) \quad (11)$$

55 (3) Related to both genome coverage and abundances:

$$56 \text{ Feature 6} = \sqrt{\frac{U_i}{E_i} * \frac{\tilde{Q}_i}{R}}, \quad (12)$$

$$57 \text{ Feature 7} = G_i = \sqrt{Q_i * U_i}, (\text{G - score}) \quad (13)$$

58

59 We then employed min-max scaling and log transformation separately for any combination of  
60 the above seven features before passing to six classifiers in the scikit-learn 1.1.0 (Logistic  
61 Regression, Support-Vector Machines, naive Bayes, K-neighbors, AdaBoost, as well as

62 Gradient Boosting Classifier) to select the best feature combination and the best classifier.  
63 Specifically, for each feature combination using each normalization and classifier, we  
64 performed five-fold cross-validation five times using the CAMI2 simulation datasets. As a result,  
65 we found that the Random Forest classifier using log transformed features 1,2,5, and 7 (i.e.,  
66 genome coverage  $C_i$ , taxonomic count  $N_i$ , sequence count  $R_i$ , and G-score  $G_i$ ) has the best  
67 performance (**Fig. S8**).  
68

### 69 **Generating a GTDB version ground truth for CAMI 2 simulation datasets**

70 CAMI 2 simulation datasets were synthesized using novel assembled microbial genomes as  
71 source genomes with only Refseq annotations<sup>3</sup>. By merging CAMI 2's source genomes with  
72 GTDB and annotating them with GTDB-TK, we were able to generate a GTDB version ground  
73 truth for MAP2B as well as improve the machine learning model's training accuracy (please  
74 see our GitHub repository for ground truth, see  
75 Manuscript/Figures/FigureS9/CAMI\_50\_abundance\_change\_in\_ground\_truth\_100W.zip,  
76 "GT\_Abd").  
77

### 78 **Validation of the false positive and true positive classifier**

79 As the most important component of MAP2B, the classification of false positives and true  
80 positives largely determines the accuracy of the final profiling result. To best utilize the four  
81 key features (genome coverage, sequence count, taxonomic count, and G-score) for  
82 distinguishing true positives from false positives, we trained a Random Forest model based  
83 on these features using all the simulated metagenomes from CAMI2. Specifically, we randomly  
84 selected 80% of the samples in each of the three CAMI2 datasets (marine, plant-associated,  
85 and strain madness datasets) to train a Random Forest model with default parameters, then  
86 tested its performance using the remaining 20% of samples. We repeated the whole process  
87 of five-fold cross-validation 50 times by randomly assigning samples in either train or test folds.  
88 When evaluating the performance of the model, the low-abundance species in the ground  
89 truth were gradually filtered out according to varying abundance thresholds from  $10^{-6}$  to  
90  $10^{-4}$ . This is because the sensitivity for species identification can be limited due to low  
91 sequencing depth (e.g., ~2GB/sample for the strain madness dataset). Some state-of-the-art  
92 metagenomic profilers<sup>4,5</sup> actually set the default abundance threshold as  $10^{-4}$ . Note that the  
93 minimum abundance in the CAMI2 datasets is  $2 \times 10^{-6}$ . Therefore, using threshold  $10^{-6}$  is  
94 equivalent to not setting any threshold.

95 We separately evaluated the performance of the Random Forest classification model on  
96 each of the three simulation datasets. For the marine dataset, when using threshold  $10^{-6}$  (or  
97 equivalently, without setting any threshold), we achieved Accuracy~0.988, AUROC~0.999,  
98 AUPRC~0.999, Precision~0.991, Recall~0.990, and F1 score~0.990, respectively (**Fig. S9a-**  
99 **f**). We then found that filtering out the species in the ground truth with abundance less than  
100  $10^{-5}$  will further increase the performance of the model. For example, in the marine dataset,  
101 the average of Accuracy, AUROC, AUPRC, Precision, Recall, and F1 increased to 0.989,  
102 0.999, 0.999, 0.991, 0.990, and 0.991, respectively. Furthermore, filtering out species with

103 relative abundance less than  $10^{-4}$  in the ground truth can maximize the performance of the  
104 model for the marine datasets (Accuracy, AUROC, AUPRC, Precision, Recall, and F1 are  
105 0.992, 1, 1, 0.991, 0.995, and 0.993, respectively). A similar trend was observed for the plant-  
106 associated (green lines and dots in **Fig. S9**) and strain madness datasets (yellow lines and  
107 dots in **Fig. S9**). The average Accuracy, AUROC, AUPRC, Precision, Recall, and F1 for the  
108 three datasets (when using  $10^{-4}$  as the threshold) are 0.993, 1, 0.997, 0.958, 0.975, and  
109 0.966, respectively. Finally, the well-trained classifier with the best performance among 50  
110 repeats will be used in MAP2B.

111

## 112 Usage of metagenomic profilers

113 For WMS data, we compared MAP2B with five state-of-the-arts metagenomic profilers:  
114 MetaPhlAn4<sup>6</sup>, mOTUs3<sup>7</sup>, Bracken<sup>5</sup>, Kraken2<sup>4</sup>, and KrakenUniq<sup>8</sup>. The detailed procedures are  
115 listed below.

116 (1) MetaPhlAn4 (v4.0.1) is a marker-gene alignment approach that relies on a precomputed  
117 databases containing clade-specific marker genes. Query reads are aligned via bowtie2  
118 to the marker genes for microbial identification and abundance estimation. The database  
119 version used is mpa\_vJan21\_CHOCOPhlAnSGB\_202103. The following MetaPhlAn4  
120 command was used.

```
121 "metaphlan input_1.fastq.gz,input_2.fastq.gz --input_type fastq --bowtie2out  
122 output.bz2 --tax_level s --nproc 32 -o output.txt"
```

123 (2) mOTUs3 (v3.0.3, database version v3.0.3) is a marker-based method that compiles a  
124 large variety of phylogenetic marker genes from multiple biomes. Query reads are aligned  
125 using bwa mem and further processed to generate an abundance profile. The following  
126 mOTUs3 command was used.

```
127 "motus profile -f input_1.fastq.gz -r input_2.fastq.gz -n sample_name -u -p -k mOTU -  
128 o output.txt -t 32"
```

129 (3) Kraken2 (v2.1.1) is a k-mers based taxonomic classification method. It searches for 35bp  
130 k-mers from the query sequence in a precomputed database that matches k-mers to the  
131 lowest common ancestor (LCA) taxon of all genomes that contain that taxon. The database  
132 was constructed using complete bacterial, archaeal, human and viral genomes from NCBI  
133 RefSeq (2020 Dec). A filtering abundance threshold of 0.01 (default) was selected. The  
134 following Kraken2 command was used.

```
135 "kraken2 --threads 32 --fastq-input --gzip-compressed --paired input_1.fastq.gz  
136 input_2.fastq.gz --output output.reads --report output.report"
```

137 (4) Bracken (v2.5) utilizes the read classification output from standard Kraken for a Bayesian  
138 re-estimation of taxonomic abundances, which significantly improves the false-positive  
139 issue of standard Kraken and implicitly normalizes for genome length. The kraken-filter  
140 was used to filter raw classifications at the 0.01 threshold. The below Bracken command  
141 was used.

```
142 "est_abundance.py -i output_kraken2.report -k db -o output"
```

143 (5) KrakenUniq (v0.5.8) is a metagenomics classifier that combines the fast k-mer-based  
144 classification of Kraken with an efficient algorithm for assessing the coverage of unique k-  
145 mers found in each species in a dataset. The database was constructed using complete

146 bacterial, archaeal and viral genomes from NCBI RefSeq (2022 Jan). A filtering abundance  
147 threshold of 0.01 (same with kraken2) was selected. The KrakenUniq command below  
148 was used.

149 `krakenuniq --db db --threads 32 --report-file output.report --gzip-compressed`  
150 `input_1.fastq.gz input_2.fastq.gz --fastq-input`

151 (6) As for MAP2B (v1), the default MAP2B command of `perl MAP2B.pl -t 2 -l data.list -d`  
152 `MAP2B_DB_GTDB -o output` was used.

153 **Supplemental Figures**

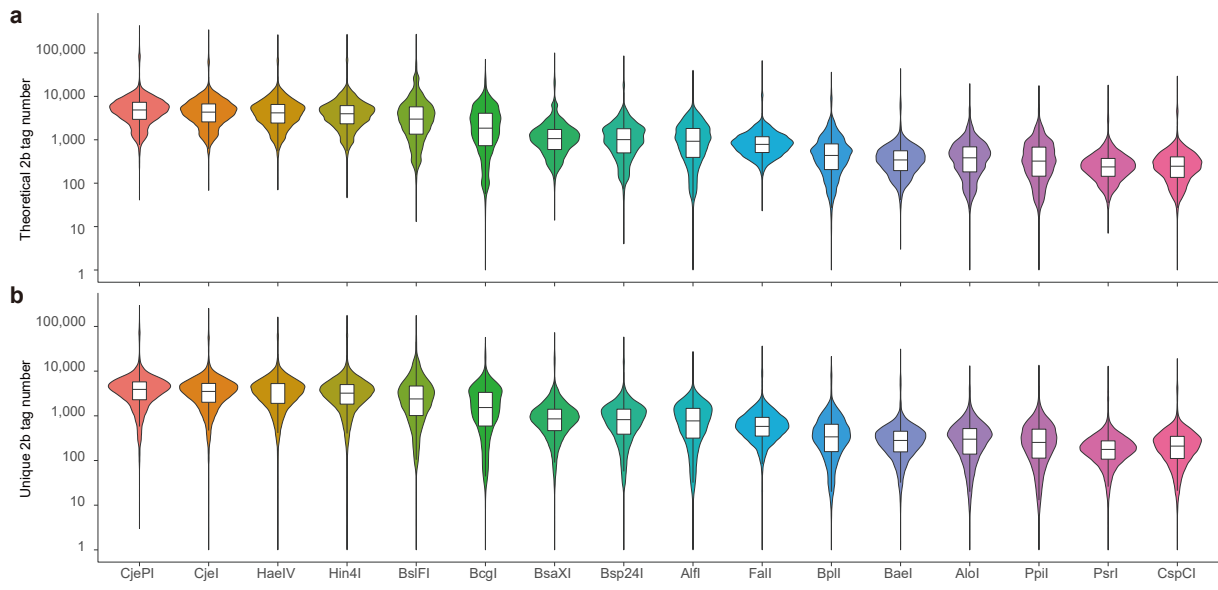

154

155 **Figure S1. Distribution of theoretically existent and unique 2b tags for all the 48,475**  
 156 **species in the combined database of GTDB and Ensembl Fungi. (a)** The theoretically  
 157 existent 2b tags ( $H_i$ ) were generated by *in silico* digestion (using 16 different Type IIB enzymes)  
 158 for 48,475 species' 258,406 microbial genomes downloaded from GTDB and Ensembl Fungi.  
 159 For species- $i$ , its theoretically existent 2b tags in the integrated database of GTDB and  
 160 Ensembl Fungi is denoted as  $H_i$ . **(b)** We then selected those 2b tags that are not  
 161 duplicated/overlapped between any two species and named them as unique 2b tags. For  
 162 species- $i$ , its unique 2b tags in the integrated database of GTDB and Ensembl Fungi is  
 163 denoted as  $E_i$ . The Type IIB restriction enzymes in X-axis are sorted by the median  $H_i$  (or  
 164  $E_i$ ) in descending order. In this paper, we used *CjePI* as the Type IIB enzyme for *in silico*  
 165 digestion since it has the highest median  $H_i$  and  $E_i$ . Using multiple IIB enzymes has limited  
 166 improvement in the accuracy of species identification and abundance estimation.

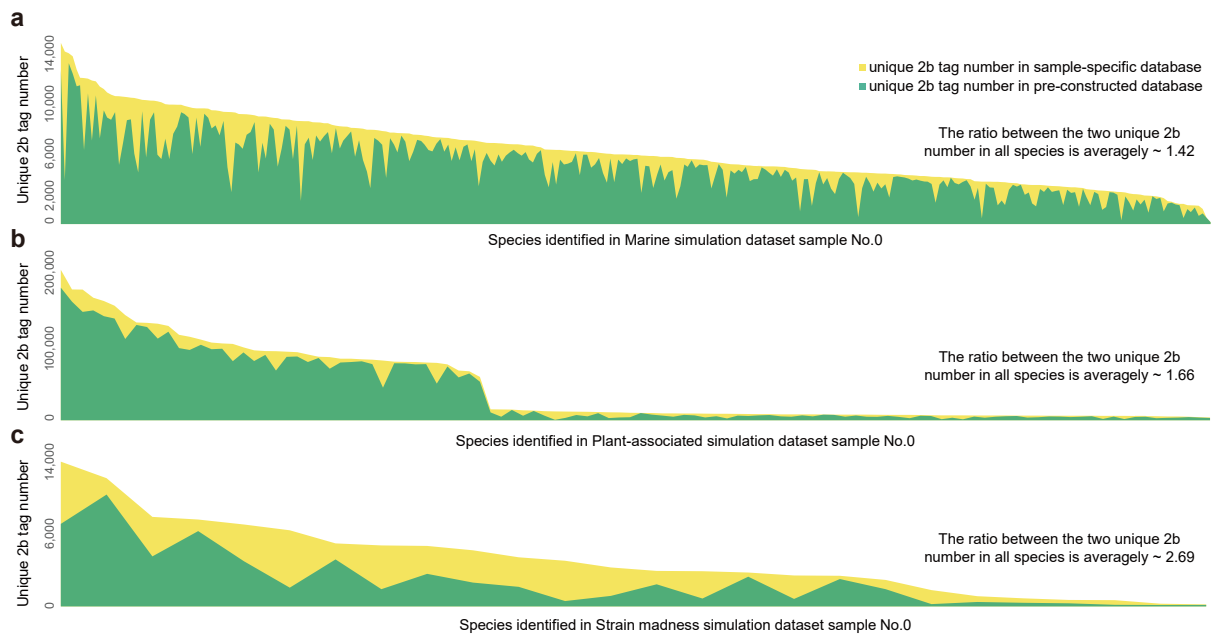

167

168

169

170

171

172

173

174

175

176

177

**Figure S2. Sample-specific unique 2b database can largely expand the number of unique 2b tags compared to pre-constructed unique 2b database.** To demonstrate the advantage of using a sample-specific unique 2b tag database for the second-round reads alignment, we consider the three CAMI2 simulation datasets of (a) marine, (b) plant-associated, and (c) strain madness as examples. We compare the number of unique 2b tags for all identified species between the preconstructed unique 2b tag database and sample-specific database and found that the average fold change for all the identified species is 1.42, 1.66, and 2.69 in the three datasets, respectively. The former contains unique 2b tags generated by comparing theoretically existent 2b tags among 48,475 species. By contrast, the latter usually contains twice unique 2b tags selected from a few hundreds of species.

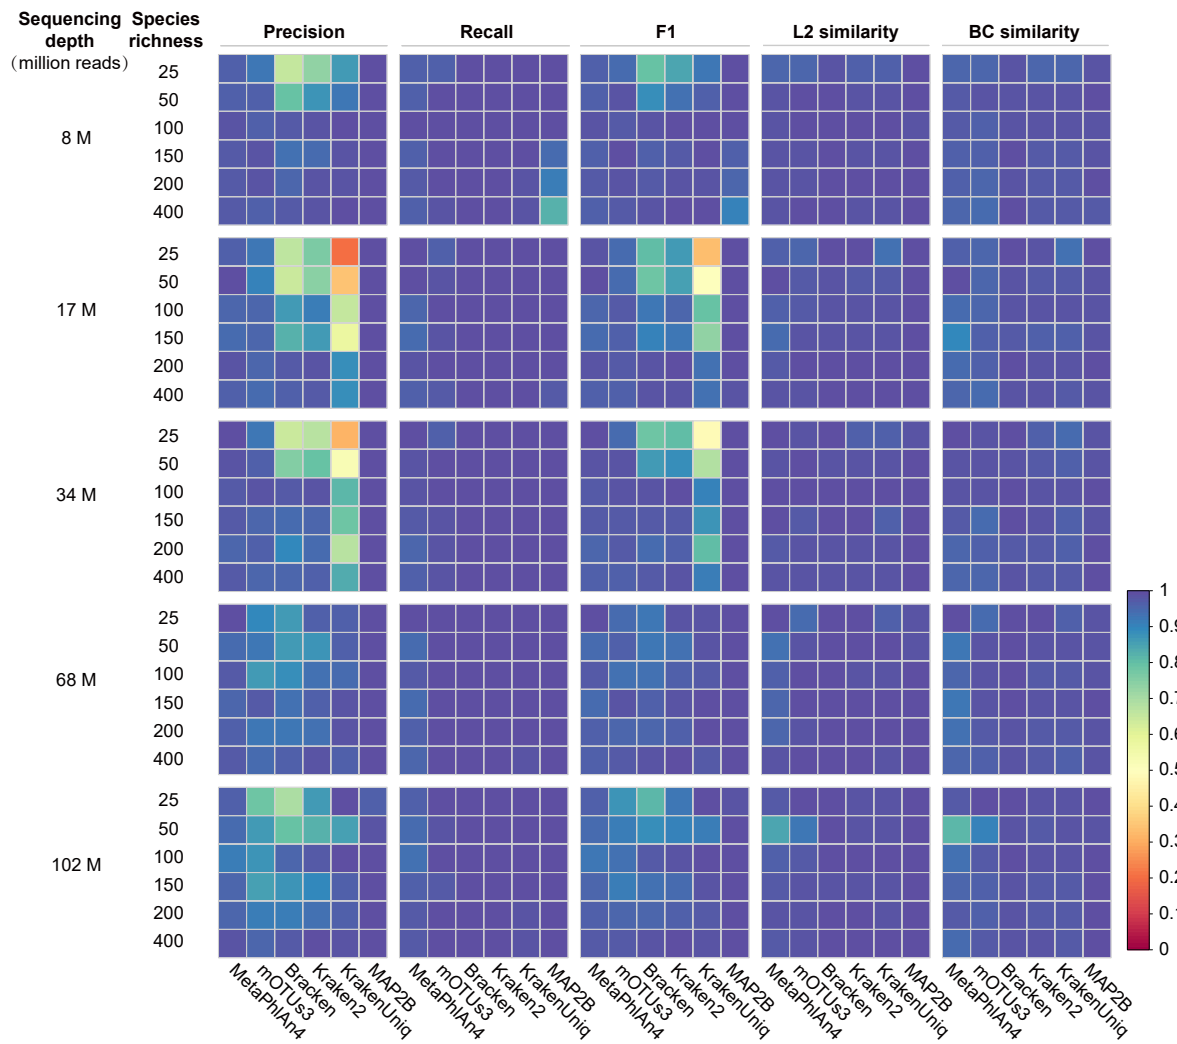

178  
 179 **Figure S3. Comparing MAP2B with other profilers using simulation data generated by**  
 180 **shared genome sources of different profilers.** To minimize the influence of different  
 181 reference databases on the evaluation, we selected the shared microbial genomes between  
 182 different metagenomic profilers (e.g., mOTU2, MetaPhlaAn, and Kraken) as genomes to  
 183 simulate WMS data. From left to right, the profiling results generated by different metagenomic  
 184 profilers were compared with ground truth and illustrated by the Precision, Recall, F1 score,  
 185 L2 similarity, and BC similarity. From top to bottom, the simulated sequencing depth increases  
 186 from 8M to 102M, and the species richness increases from 25 to 400 under each sequencing  
 187 depth. Since selecting the intersection of different metagenomic profilers' reference genomes  
 188 dramatically decreased the number of source genomes for simulation, we slightly adjusted the  
 189 species number and sequencing depth compared to Fig. 3.



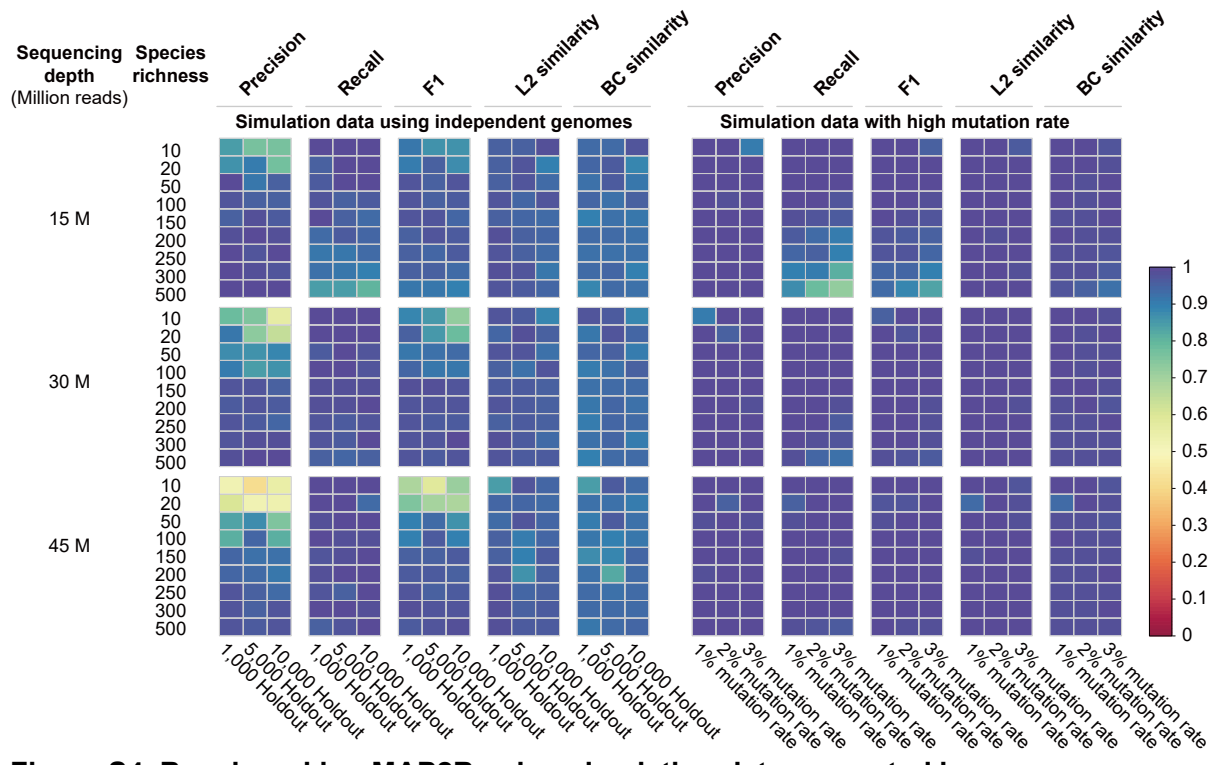

190

191

192

193

194

195

196

197

198

199

200

201

**Figure S4. Benchmarking MAP2B using simulation data generated by genome sources independent of GTDB or with high a mutation rate.** To overcome the challenge of accurately estimating species abundance in the absence of microbial genomes in the reference database, we implemented a systematic partitioning approach for the GTDB database. We utilized held-out genomes to simulate whole metagenome sequencing (WMS) data and systematically varied the mutation rate in the simulated data. The resulting profiles were compared to ground truth using Precision, Recall, F1 score, L2 similarity, and BC similarity metrics. We tested different numbers of holdout genomes and mutation rates, and the results were illustrated from left to right. In this evaluation, we also increased the simulated sequencing depth from 15M to 45M and increased species richness from 10 to 500 for each sequencing depth.

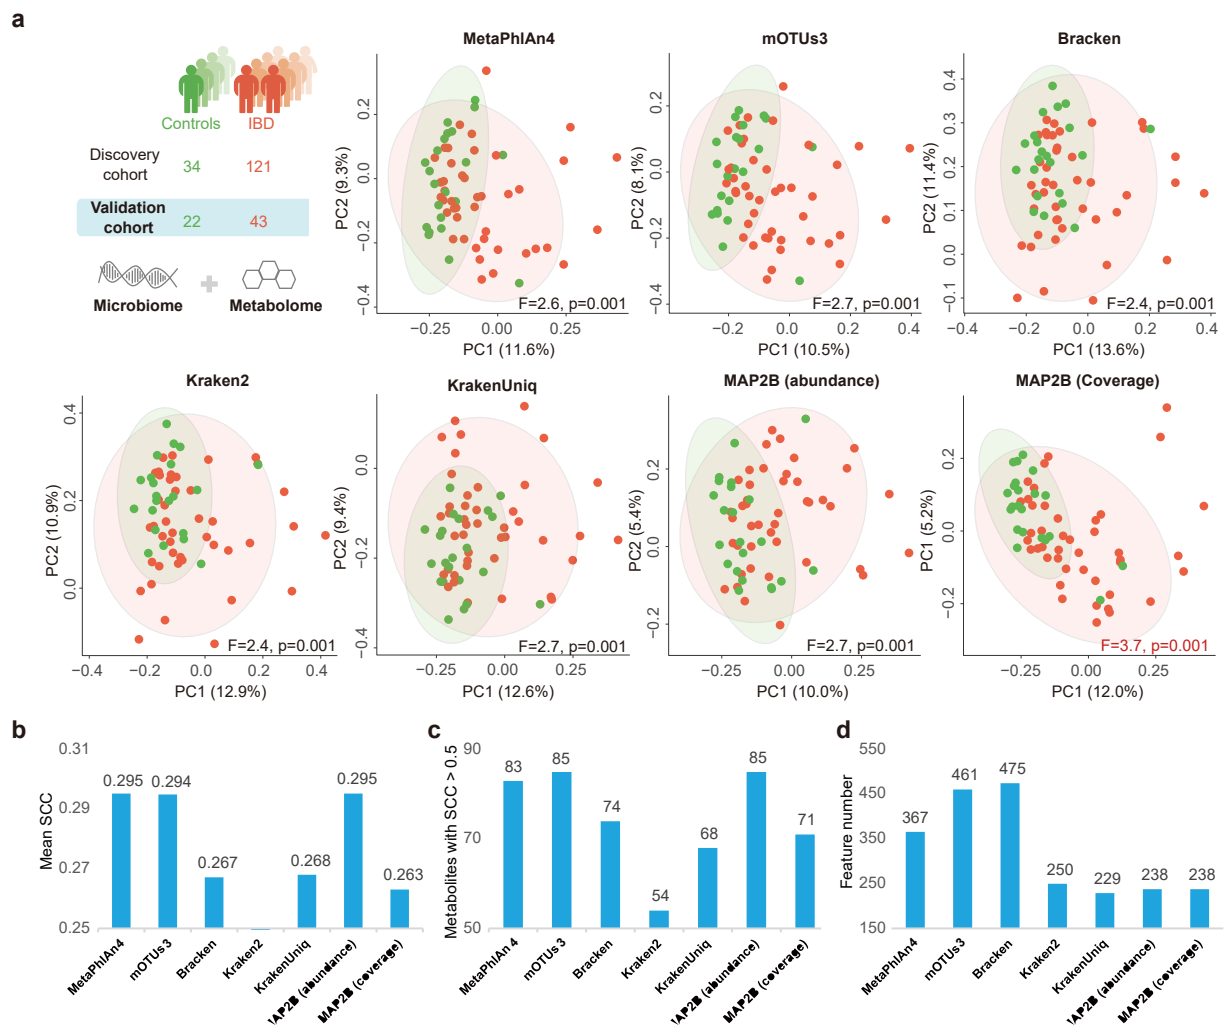

202  
 203  
 204  
 205  
 206  
 207  
 208  
 209  
 210  
 211  
 212  
 213  
 214

**Figure S5. Assessing MAP2B's microbial profiles in disease discrimination (validation cohort) and prediction of metabolomic profiles.** (a) PCoA plots for the validation cohort (n=65) based on the taxonomic profiles generated by different profilers. The ellipses with 95% CI are drawn to illustrate the difference between IBD (red dots) and non-IBD (green dots) in PCoA. F values of the PERMANOVA are also marked on the bottom of each plot to quantify the difference in disease status. (b) Comparison of prediction results by using different taxonomic profiling via mean SCC of the metabolite between its true values and predicted values across all individuals in the validation cohort. (c) Comparison of the number of metabolites with SCCs larger than 0.5 among different taxonomic profiling results. (d) Comparison of the number of taxonomic features used by different metagenomic profilers in the prediction for metabolomic profiles. The prediction results in (b) - (c) were generated by the mNODE which is in line with MiMeNet (Fig. 5b-c).

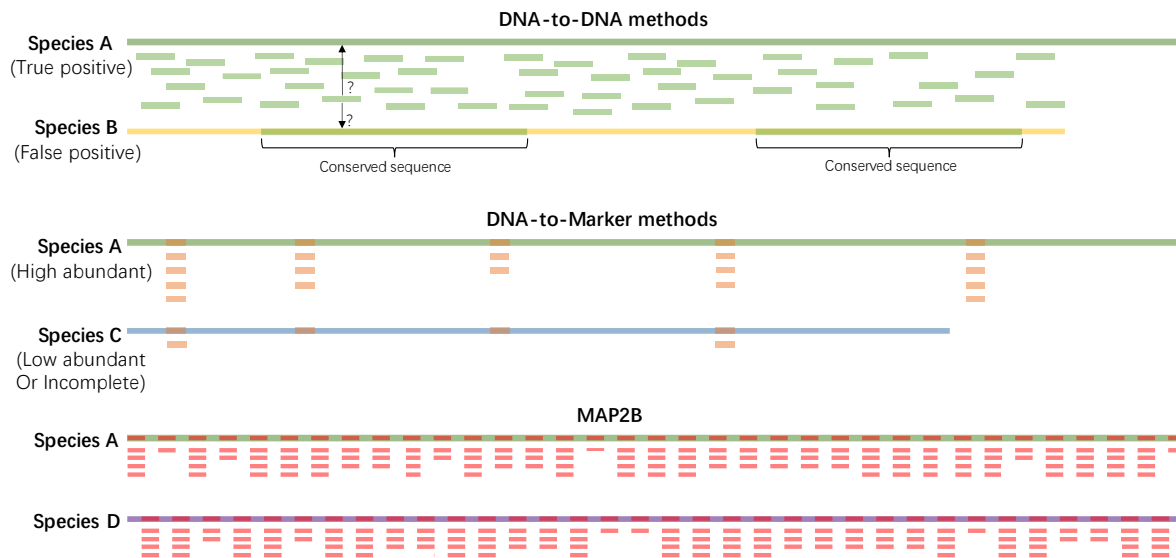

215

216

**Figure S6. Comparison of the algorithm implemented in MAP2B and conventional**

217

**metagenomic profiling tools.** Using the whole genome as a reference, DNA-to-DNA

218

methods (such as Bracken, Kraken, CLARK, Centrifuge, and PathSeq) may be confused by

219

multi-alignments in conserved sequences, leading to a high rate of false positives. Although

220

DNA-to-Marker methods (such as MetaPhlan and mOTUs) can naturally avoid this issue, they

221

may be limited by the availability of universal markers, such as missing markers from

222

incomplete microbial genomes during database construction, high marker similarity among

223

conspecific taxa during database construction (and sequencing), and undetectable markers

224

in low abundant taxa during sequencing. MAP2B is not relying on the whole genome or

225

universal marker genes as references. Using species-specific 2b tags can also avoid the multi-

226

alignment issue while providing ample small markers for species identification.

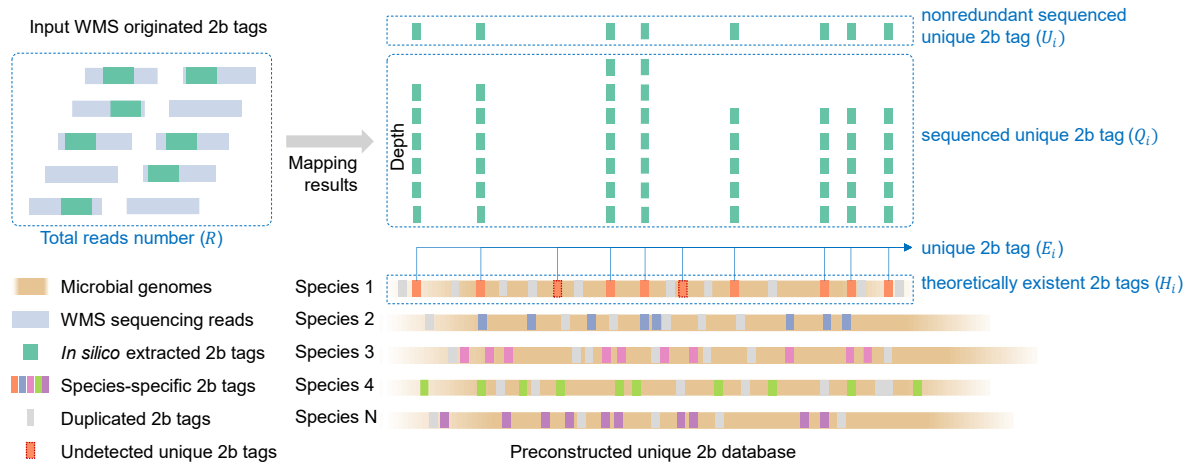

227

228

229

230

231

232

233

234

235

236

**Figure S7. Definition of the terminology used in the species identification procedures of MAP2B.** For species- $i$ , we denote its total number of 2b tags generated by *in silico* digestion of its genome as  $H_i$ . Among the  $H_i$  tags, there are  $E_i$  tags that are single-copy within the genome of species- $i$ , and are unique to species- $i$  w.r.t all other species in the database of microbial genomes. Given an input WMS sequencing dataset, we *in silico* extract 2b tags, map them to the species-specific 2b tags, and denote the number of tags unique to species- $i$  as  $Q_i$ . Among the  $Q_i$  tags unique to species- $i$ , there are  $U_i$  distinct or nonredundant ones.  $R$  is the total number of reads in the WMS sequencing data, which can vary a lot across different samples.

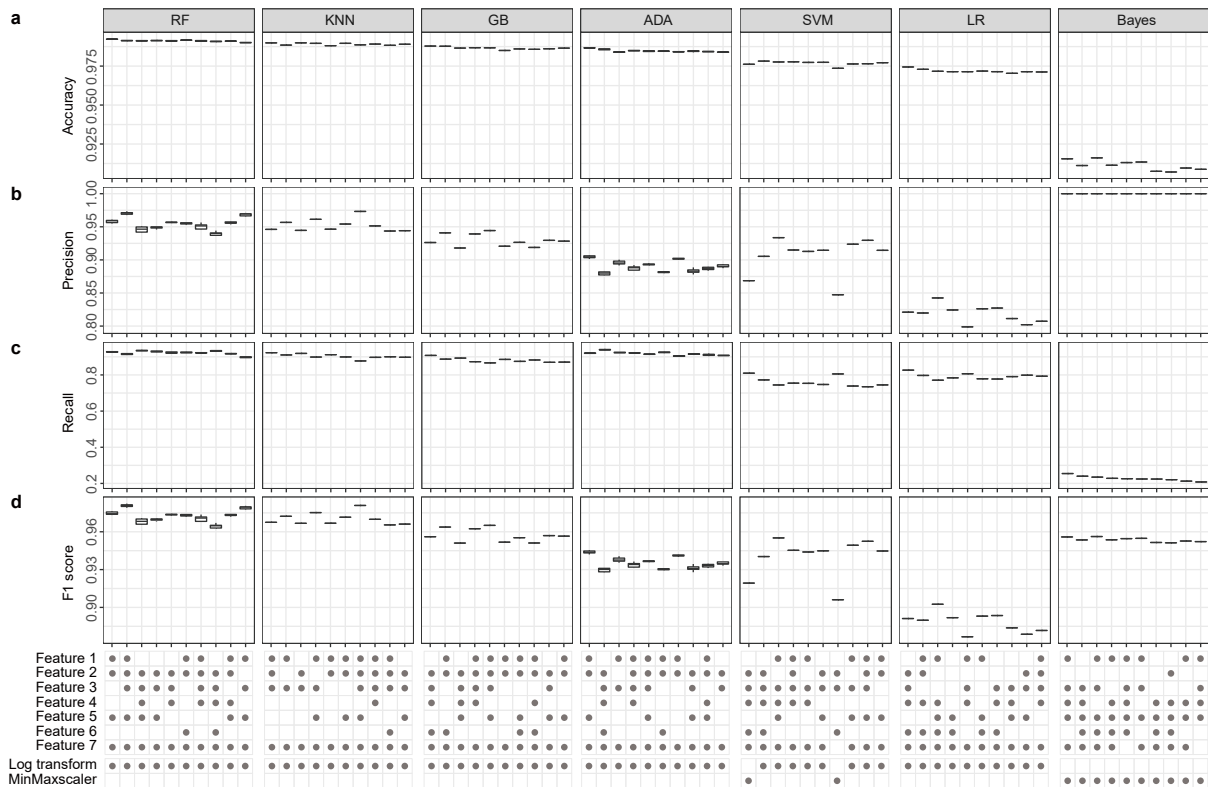

237

238

239

240

241

242

243

244

245

**Figure S8. TOP-10 feature combinations for each classifier in discriminating false positives from true positives.** To select the best feature combination, and the best classifier, both min-max scaling and log transformation were used separately for any combination of the seven features before passing to seven classifiers: Random Forest (RF), K-neighbors (KNN), Gradient Boosting (GB), AdaBoost (ADA), Support-Vector Machines (SVM), Logistic Regression (LR), and naive Bayes (Bayes). For each feature combination and each classifier, we performed five-fold cross-validation five times using the CAMI2 simulation datasets and compared their performance via (a) Accuracy, (b) Precision, (c) Recall, and (d) F1 score.

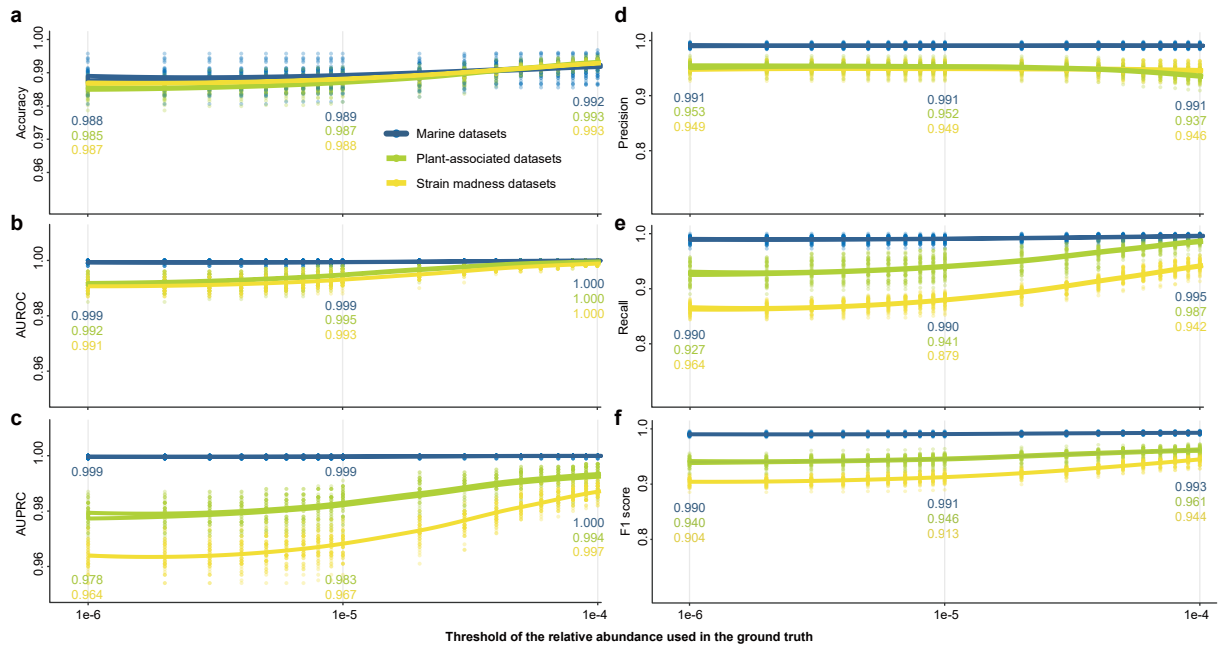

246

247

248

249

250

251

252

253

254

**Figure S9. Performance evaluations of the machine learning model on false positive recognition based on 50 times five-fold cross-validation.** When evaluating the performance of the model, the low-abundance species in the ground truth were filtered out according to different abundance thresholds. We gradually discard the true species with relative abundance from  $10^{-6}$  to  $10^{-4}$  and illustrate the performance of the model in determining false positives using metrics such as (a) the Area Under the Receiver Operating Characteristic (AUROC) curve; (b) the Area Under the Precision-Recall Curve (AUPRC); (c) Accuracy; (d) Precision; (e) Recall; and (f) F1-score.

255 **Reference**

- 256 1. Parks, D.H. et al. A complete domain-to-species taxonomy for Bacteria and Archaea.  
257 *Nat Biotechnol* **38**, 1079-1086 (2020).
- 258 2. Yates, A.D. et al. Ensembl Genomes 2022: an expanding genome resource for non-  
259 vertebrates. *Nucleic Acids Res* **50**, D996-D1003 (2022).
- 260 3. Meyer, F. et al. Critical Assessment of Metagenome Interpretation: the second round  
261 of challenges. *Nature methods* **19**, 429-+ (2022).
- 262 4. Wood, D.E., Lu, J. & Langmead, B. Improved metagenomic analysis with Kraken 2.  
263 *Genome biology* **20**, 257 (2019).
- 264 5. Lu, J., Breitwieser, F.P., Thielen, P. & Salzberg, S.L. Bracken: estimating species  
265 abundance in metagenomics data. *PeerJ Computer Science* **3**, e104 (2017).
- 266 6. Blanco-Miguez, A. et al. Extending and improving metagenomic taxonomic profiling  
267 with uncharacterized species using MetaPhlAn 4. *Nat Biotechnol* (2023).
- 268 7. Ruscheweyh, H.J. et al. Cultivation-independent genomes greatly expand taxonomic-  
269 profiling capabilities of mOTUs across various environments. *Microbiome* **10**, 212  
270 (2022).
- 271 8. Breitwieser, F.P., Baker, D.N. & Salzberg, S.L. KrakenUniq: confident and fast  
272 metagenomics classification using unique k-mer counts. *Genome biology* **19**, 198  
273 (2018).
